# Supplementary material
Source: PubMed Central journal article supplement (PMC8832557)
Supplement: mmc1.pdf [file mmc1.pdf]

**Supplemental information**

**Imatinib and methazolamide ameliorate COVID-19-  
induced metabolic complications via elevating ACE2  
enzymatic activity and inhibiting viral entry**

**Zilun Li, Meixiu Peng, Pin Chen, Chenshu Liu, Ao Hu, Yixin Zhang, Jiangyun Peng, Jiang Liu, Yihui Li, Wenxue Li, Wei Zhu, Dongxian Guan, Yang Zhang, Hongyin Chen, Jiuzhou Li, Dongxiao Fan, Kan Huang, Fen Lin, Zefeng Zhang, Zeling Guo, Hengli Luo, Xi He, Yuanyuan Zhu, Linghua Li, Bingding Huang, Weikang Cai, Lei Gu, Yutong Lu, Kai Deng, Li Yan, and Sifan Chen**

## **Supplemental Information**

### **Supplemental Information Inventory**

#### **1. Supplemental Figures Legends**

#### **2. Supplemental Figures:**

Figure S1 related to Figure 1

Figure S2 related to Figure 2

Figure S3 related to Figure 3

Figure S4 related to Figure 4

Figure S5 related to Figure 5

Figure S6 related to Figure 6

**3. Supplemental Table 1. DisGeNET query with four metabolic diseases, Related to Figure 1.**

**4. Supplemental Table 2. OpenTargetPlatform query with four metabolic diseases, Related to Figure 1.**

**5. Supplemental Table 3. The process of different steps upon high throughput compounds screening, Related to Figure 3.**

**6. Supplemental Table 4. Oligos used in this study, Related to STAR Methods.**

**7. Supplemental Table 5. References for meta-analysis of the risk of severity and mortality in COVID-19 patients treated with or without ACEi or ARB, Related to STAR Methods.**

## Supplementary Figure Legends

### Figure S1. ACE2 is a Key Molecule Potentially Linking COVID-19 to Associated Metabolic Defects, Related to Figure 1.

(A-B) HUVECs were infected by SARS-CoV-2 (MOI = 0.005) for 24 h and subjected to transcriptome study. Kyoto Encyclopedia of Genes and Genomes (**KEGG**) pathway enrichment (A) and Gene Ontology (**GO**) pathway enrichment (B) of differentially expressed genes after infection were shown. (C) HUVECs were treated with vehicle (-) or combination of 50 ng/ml of TNF- $\alpha$ , IL-4, IL-6 and IFN- $\gamma$  for 48 h and were subjected to real-time PCR of *ACE2* (n = 3). Error bars represent SEM; \* p < 0.05; \*\* p < 0.01; \*\*\* p < 0.001.

### Figure S2. ACE2 Plays an Important Role in Maintaining Metabolic Homeostasis, Related to Figure 2.

(A-D) HUVECs were transfected with ACE2 plasmid for overexpression for 72 h and subjected to real-time PCR (n = 4). (E-N) Eight-week-old male ob/ob mice were treated with intravenous injection of AAV9-CAG-humanACE2-EGFP (**ob/ob-ACE2**) or corresponding control virus (**ob/ob-Con**) and their wild type littermates with control virus (**WT-Con**), and all mice were sacrificed at 12 weeks after 6 h fasting. Livers were subjected to immunoblotting of ACE2 (E, blot shown on the left, quantification on the right; n = 4). The ratio of plasma Ang II to Ang-(1-7) (F) was shown (n = 5). Body weight gain at 4 weeks after virus injection was calculated as body weight on sacrificed day against body weight on virus injection day (G), epididymal fat index (H), food intake (I) and water intake (J) were shown (n = 6). Plasma triglyceride (TG) (K) and total cholesterol (TC) (L) were shown (n = 5). (M) H&E staining in livers was shown. (N) Quantifications of TC in liver were shown (n = 6). Error bars represent SEM, \* p < 0.05, \*\* p < 0.01 and \*\*\* p < 0.001. **Ang II**, angiotensin II; **Ang-(1-7)**, angiotensin (1-7).

### Figure S3. Imatinib, Harpagoside and Methazolamide Are Identified as ACE2 Activators, Related to Figure 3.

(A) Conformational shuffling of ACE2 structure between closed (PDB code: 1R4L) and open state (PDB code: 1R42). (B) Knockdown efficiency of ACE2 siRNA in HUVECs was shown after real-time PCR analysis (n = 4). (C) Cell viability with the highest concentration of 15 compounds

in HUVECs was determined by lactate dehydrogenase (LDH) assay (n = 6). **(D-I)** HUVECs were treated with diminazene aceturate (**DIZE**, 100  $\mu$ M), imatinib (**Ima**), harpagoside (**Har**) or methazolamide (**Met**) for 16 h and subjected to real-time PCR (n = 6). **(J-M)** HUVECs were treated with combination of 50 ng/ml TNF- $\alpha$ , IFN- $\gamma$ , IL-4 and IL-6 for 32 h following imatinib, harpagoside or methazolamide for 16 h and subjected to real-time PCR (n = 6). The significance of Inflammatory factors versus Control was shown as #, Ima/Har/Met + Inflammatory factors versus Inflammatory factors as \*. **(N-S)** HUVECs were treated with 10 nM control siRNA (**siCon**) or ACE2 siRNA (**siACE2**) for 8 h following imatinib, harpagoside or methazolamide for 16 h and subjected to real-time PCR (n = 4). **(T-W)** HUVECs were treated with imatinib, harpagoside or methazolamide for 16 h, and subjected to real-time PCR of *ACE2* (**T**) (n = 6), and immunoblotting (**U-W**, blot shown on the left, quantification on the right; n = 4). **L**, low concentration; **M**, medium concentration; **H**, high concentration; imatinib: 1  $\mu$ M, 5  $\mu$ M, 25  $\mu$ M, respectively; harpagoside: 4  $\mu$ M, 20  $\mu$ M, 100  $\mu$ M, respectively; methazolamide: 4  $\mu$ M, 20  $\mu$ M, 100  $\mu$ M, respectively. Error bars represent SEM, \*p < 0.05, \*\*p < 0.01 and \*\*\*p < 0.001; #p < 0.05, ##p < 0.01 and ###p < 0.001.

**Figure S4. Imatinib, Harpagoside and Methazolamide Directly Bind to and Activate ACE2, Related to Figure 4.**

**(A)** Alignment of human and mouse ACE2 protein. Conserved amino acid residues for two proteins were labeled with asterisk (\*), as unconserved amino acid residues were highlighted in red. **(B)** Murine AML12 cells were treated with 10 nM control siRNA (**Con**) and ACE2 siRNA (**siACE2**) for 24 h and subjected to real-time PCR (n = 6). **(C-E)** AML12 cells were treated with imatinib, harpagoside or methazolamide for 16 h and subjected to real-time PCR (n = 5). **L**, low concentration; **H**, high concentration; imatinib: 1  $\mu$ M, 25  $\mu$ M, respectively; harpagoside: 4  $\mu$ M, 100  $\mu$ M, respectively; methazolamide: 4  $\mu$ M, 100  $\mu$ M, respectively. Error bars represent SEM, \*p < 0.05, \*\*p < 0.01 and \*\*\*p < 0.001.

**Figure S5. Imatinib and Methazolamide Ameliorate Metabolic Defects in Insulin-resistant Mice via ACE2, Related to Figure 5.**

**(A-L)** Twenty-eight-week-old male mice with 23 weeks high-fat-diet treatment (**DIO**) and controlled lean mice (**Lean**) were treated with vehicle, 250 mg/kg of imatinib (**DIO + Ima**) or 100 mg/kg of methazolamide (**DIO + Met**) through gavage once each day for 4 weeks. At 32 weeks,



all mice were fasted for 6 h and sacrificed. Body weight (**A**), epididymal fat index (**B**), food intake (**C**) and water intake (**D**) were shown (n = 6). The significance of DIO versus Lean was shown as \*, DIO+Met versus DIO as #. \*#p < 0.05, \*\*\*#p < 0.01 and \*\*\*\*#p < 0.001. Plasma triglyceride (**TG**) (**E**), total cholesterol (**TC**) (**F**), alanine aminotransferase (**ALT**) (**G**) and aminotransferase (**AST**) (**H**) were shown. Livers were subjected to quantifications of TG (**I**) and TC (**J**) (n = 6) and immunoblotting of FoxO1 (**K**, blot shown on the left, quantification on the right; n = 6) and ACE2 (**L**, blot shown on the left, quantification on the right; n = 6). (**M-O**) For whole body knockdown of ACE2 (**ACE2 kd**), twenty-six-week-old male mice with 21 weeks high-fat-diet treatment (**DIO**) were treated with intravenous injection of AAV9-CAG-mACE2shRNA-EGFP or control virus. After two weeks recovery, all mice were given vehicle (**DIO** and **DIO + ACE2 kd**), 250 mg/kg of imatinib (**DIO + Ima** and **DIO + Ima + ACE2 kd**) or 100 mg/kg of methazolamide (**DIO + Met** and **DIO + Met + ACE2 kd**) through gavage once each day for 4 weeks. At 32 weeks, all mice were fasted for 6 h and sacrificed. Livers, kidneys and aortas were subjected to real-time PCR (**M**) (n = 3). Glucose tolerance testing (**GTT**) was performed at 30 weeks (**N**), and insulin tolerance testing (**ITT**) was performed at 31 weeks (**O**) (n = 6). The significance of Lean versus DIO was shown as \*, DIO versus DIO + Ima as #, DIO versus DIO + Met as \$, and DIO + Ima versus DIO + Ima + ACE2 kd as &. \*#&p < 0.05, \*\*\*#&&p < 0.01 and \*\*\*\*#&&&p < 0.001. (**P**) Kidneys from kidney conditional knockdown of ACE2 (**ACE2 C-kd**) with transparenchymal renal pelvis injection of AAV9-CAG-mACE2shRNA-EGFP or control virus were subjected to real-time PCR for knockdown efficiency analysis (n = 6). (**Q, R**) Twenty-eight-week-old male mice with 23 weeks high-fat-diet treatment were treated with vehicle (**DIO**), 250 mg/kg of imatinib (**DIO + Ima**) or 100 mg/kg of methazolamide (**DIO + Met**) through gavage once each day for 4 weeks. At 32 weeks, all mice were fasted for 6 h and sacrificed. Kidneys (**Q**) and aortas (**R**) were subjected to real-time PCR (n = 4-6). Error bars represent SEM. \*p < 0.05, \*\*p < 0.01 and \*\*\*p < 0.001.

**Figure S6. ACE2 Enzymatic Activators Improve Metabolic Defects and Inhibit Virus Entry upon SARS-CoV-2 Infection, Related to Figure 6.**

(**A**) Twelve-week-old human ACE2 transgenic mice were treated with vehicle (**Mock** and **CoV-2**), 250 mg/kg imatinib (**CoV-2 + Ima**) or 100 mg/kg methazolamide (**CoV-2 + Met**) through gavage once each day for 4 weeks after 6 weeks high-fat-diet treatment and were intranasally challenged with  $4 \times 10^4$  FFU SARS-CoV-2. After 7 days post infection, all mice were fasted for 6 h and

sacrificed. Lungs were subjected to immunohistochemistry stainings for viral nucleocapsid protein (NP). (B-C) Vero E6 cells were pre-treated with 25  $\mu$ M imatinib, 100  $\mu$ M harpagoside or 100  $\mu$ M methazolamide for 6 h, followed by SARS-CoV-2 (MOI = 0.005) infection for 42 h, and focus formation assay for the titer of active virus in the supernatant was performed (B). (C) Infected Vero E6 cells were further subjected to real-time PCR (n = 6). (D) HEK293T cells expressing hACE2 were pre-treated with 25  $\mu$ M imatinib, 100  $\mu$ M harpagoside or 100  $\mu$ M methazolamide for 6 h, followed by pseudovirions treatment for 66 h and were examined with lactate dehydrogenase (LDH) assay (n = 5). (E) The binding free energy of spike to ACE2 protein with or without imatinib or methazolamide was shown. (F, G) The structural conformations of spike and ACE2 protein before and after binding to imatinib (F, arrow) or methazolamide (G, arrow) were shown. Spike and ACE2 protein were labeled in gray before binding to the compounds, whereas spike protein in red, ACE2 in green (F) or blue (G) after binding. (H) meta-analysis of ACEi/ARB application and risk of severity and mortality in COVID-19 patients with hypertension were shown. CI, confidence interval. Error bars represent SEM. \*\*p < 0.01 and \*\*\*p < 0.001.

Supplementary Figure 1

A KEGG Enrichment

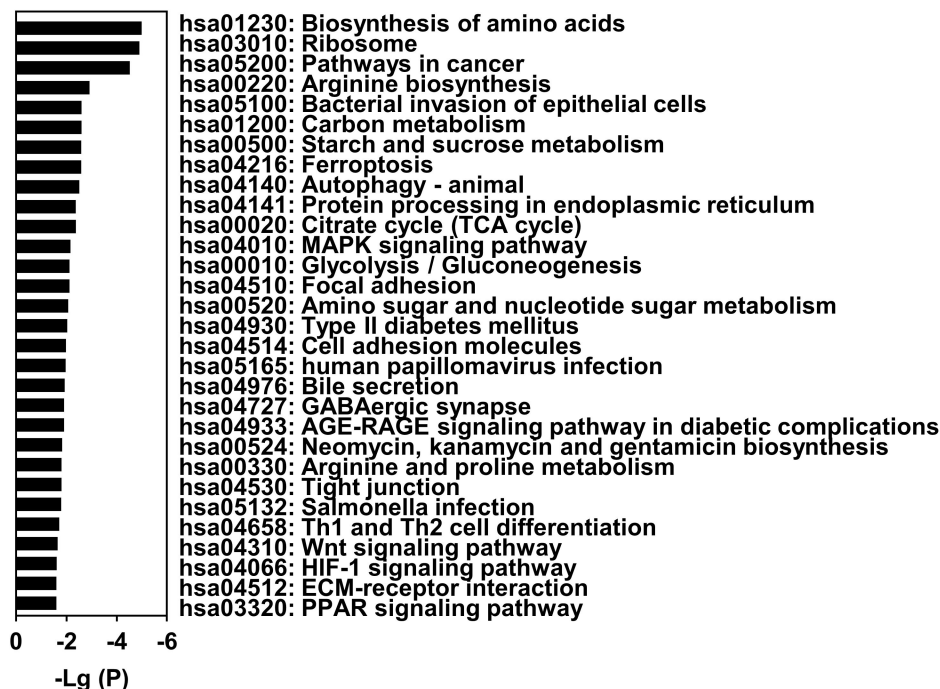

B GO Enrichment

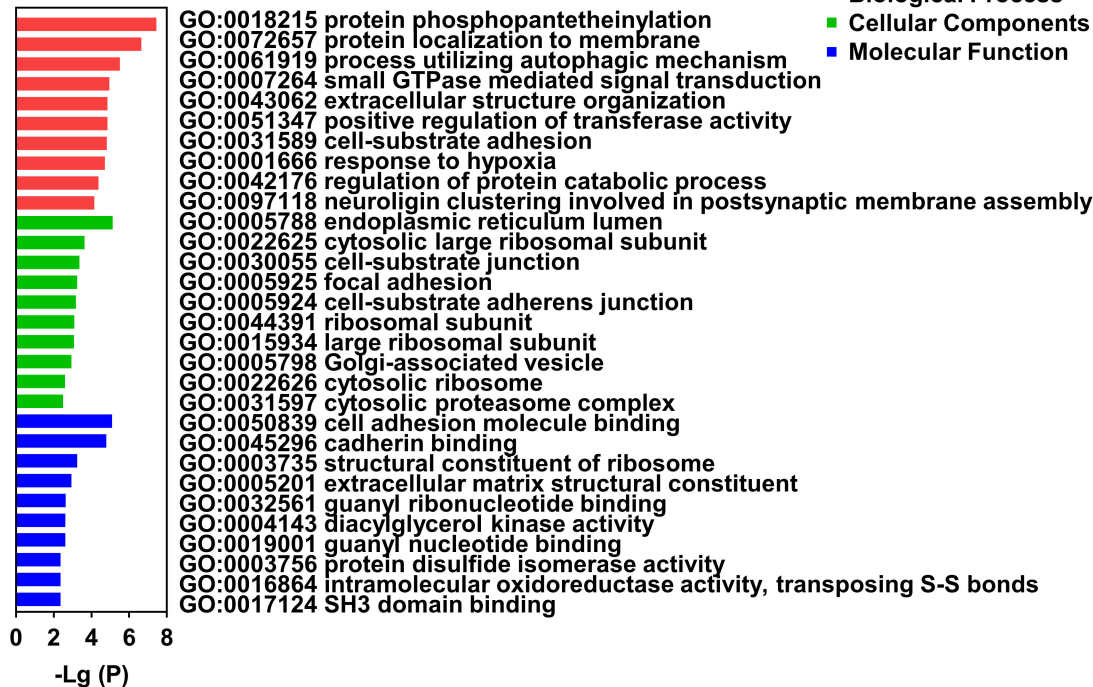

C ACE2

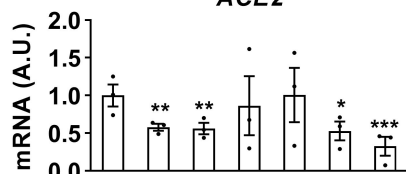

| Treatment     | 50 ng/ml | 50 ng/ml | 50 ng/ml | 50 ng/ml |
|---------------|----------|----------|----------|----------|
| TNF-α (ng/ml) | -        | 50       | -        | 50       |
| IL-4 (ng/ml)  | -        | -        | 50       | 50       |
| IL-6 (ng/ml)  | -        | -        | -        | 50       |
| IFN-γ (ng/ml) | -        | -        | -        | 50       |

Supplementary Figure 2

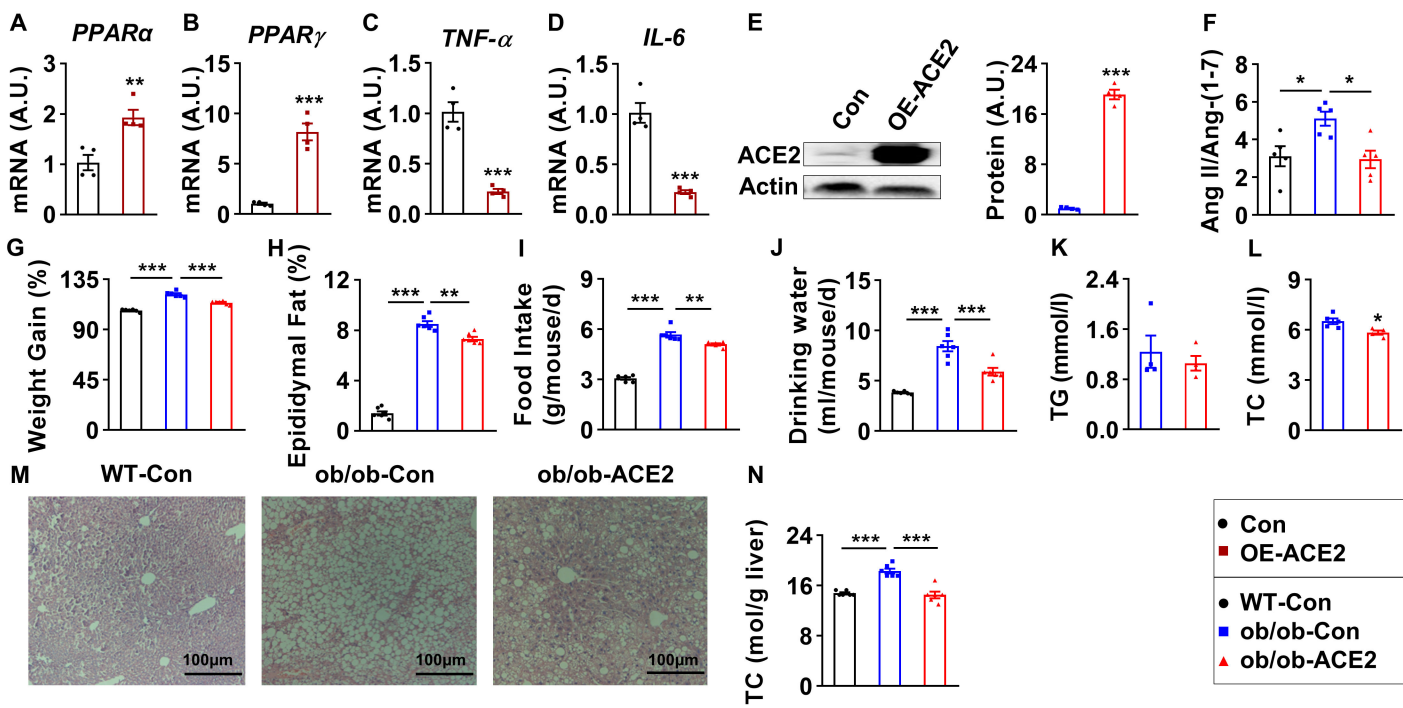

Supplementary Figure 3

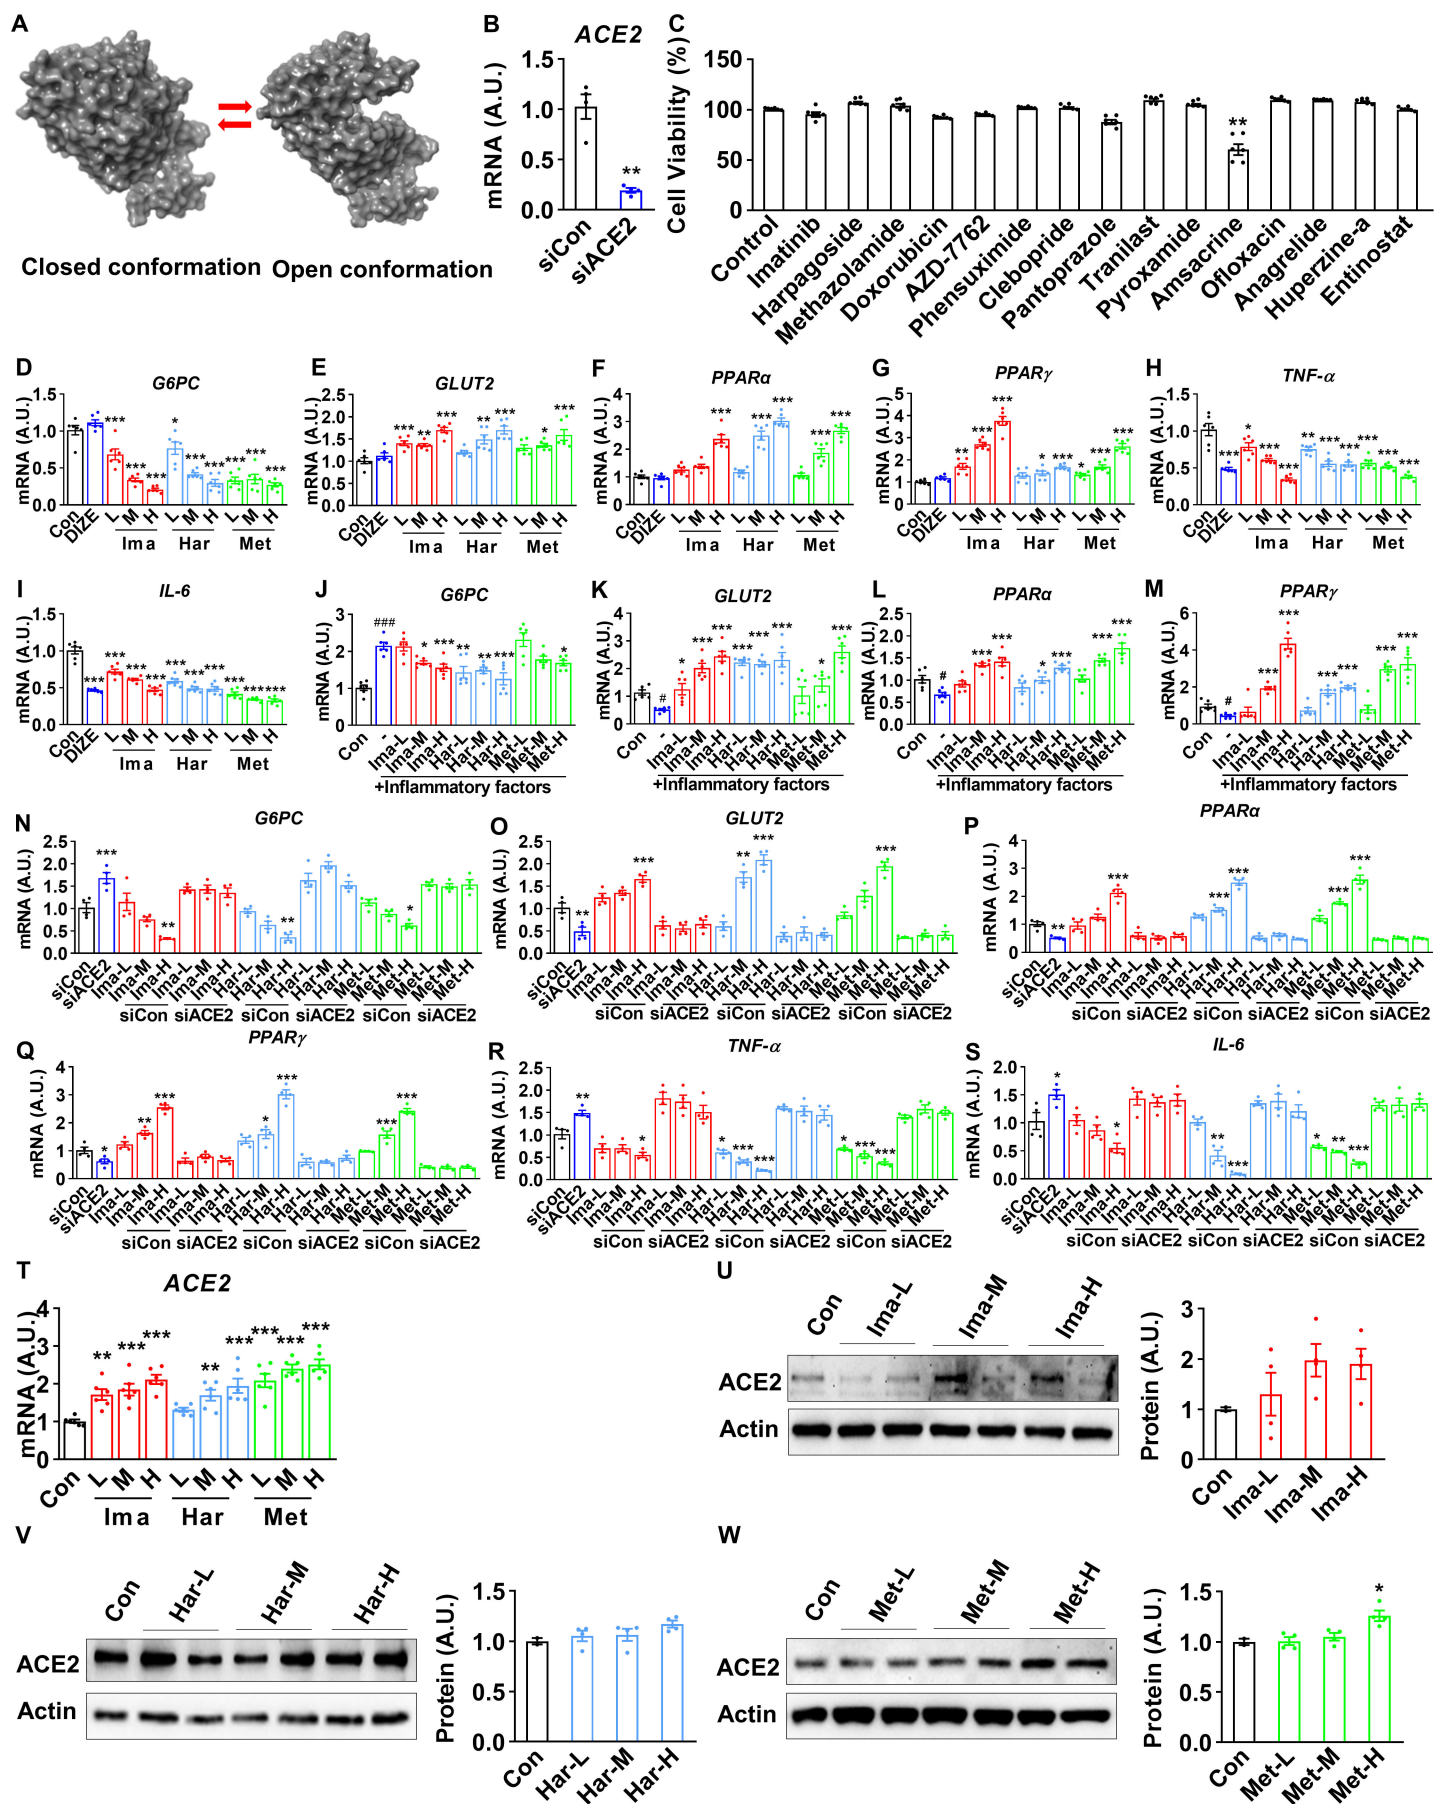





Supplementary Figure 5

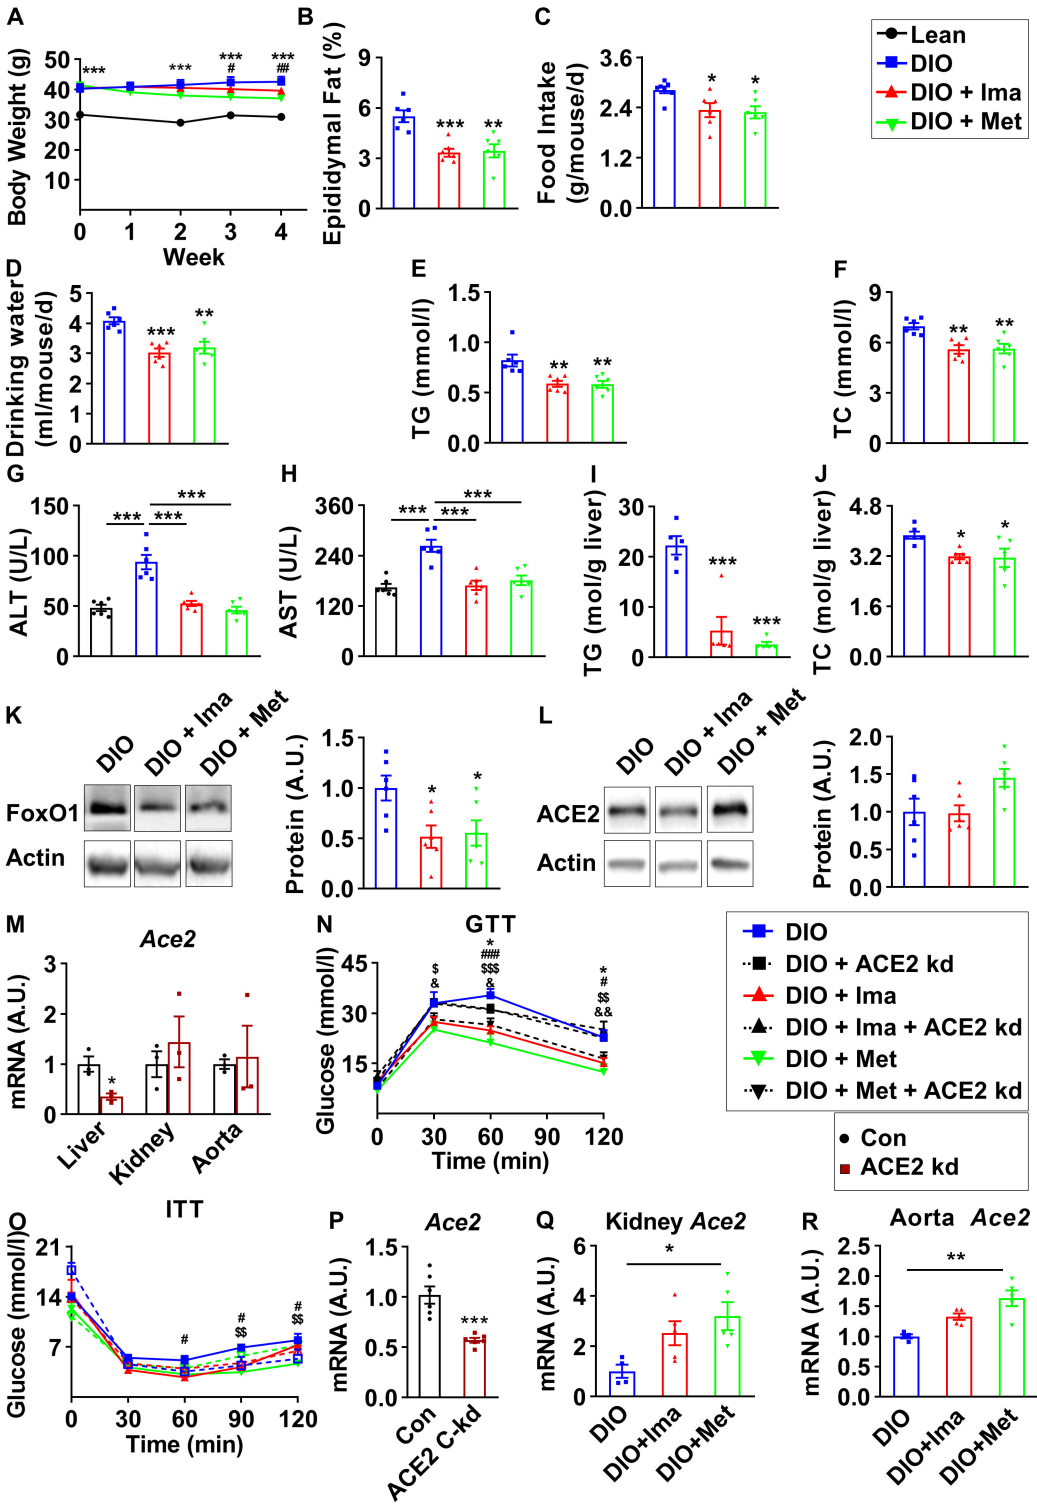

Supplementary Figure 6

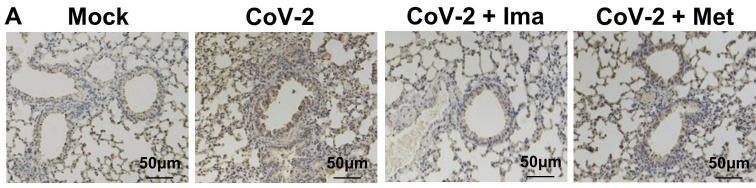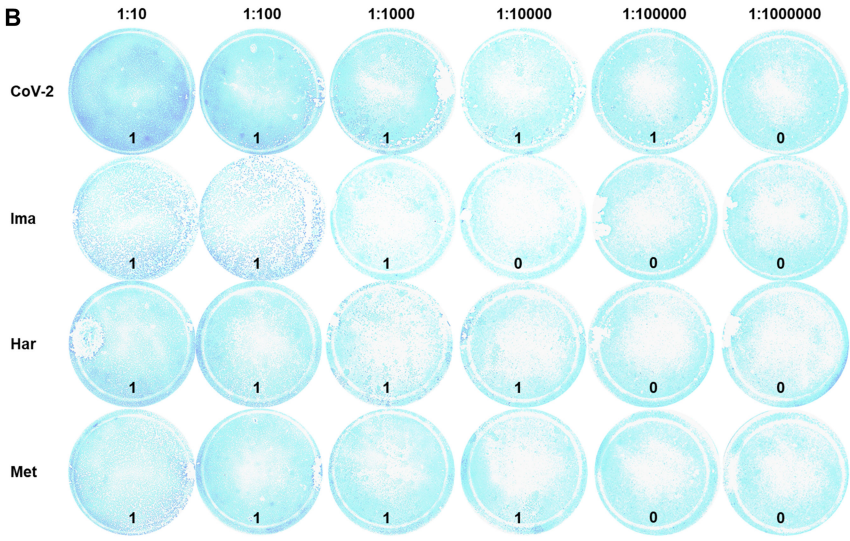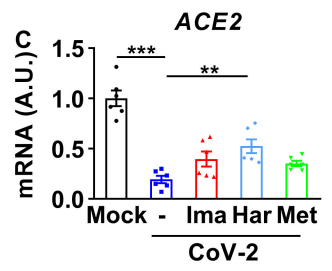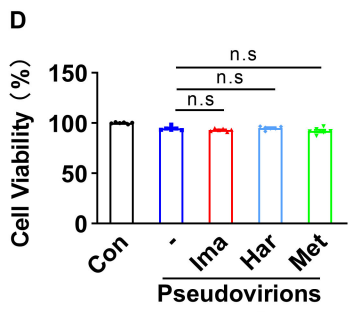

**E**

**Molecular dynamics simulation**

| System                         | Interaction Types                     | Binding free energy (kcal/mol) |
|--------------------------------|---------------------------------------|--------------------------------|
| Spike protein-ACE2 system      | Spike protein to ACE2                 | -264.784 ± 28.139              |
| Spike protein-ACE2-Drug system | Spike protein to ACE2 (Imatinib)      | -249.744 ± 30.329              |
|                                | Spike protein to ACE2 (Methazolamide) | -258.103 ± 29.533              |

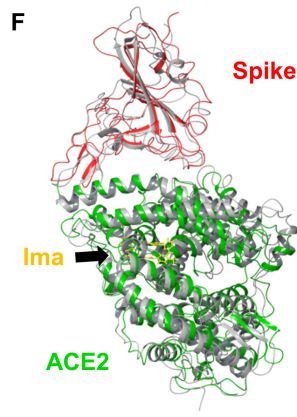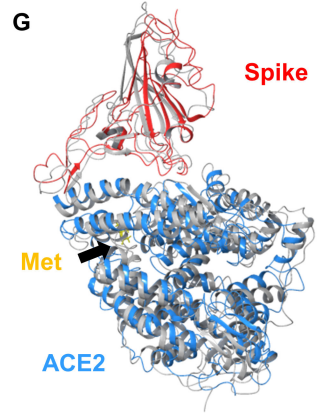

**H**

| Meta-analysis | ACEi/ARB group |                | Non-ACEi/ARB group |                | Heterogeneity  |        | Odds Ratio 95% CI |
|---------------|----------------|----------------|--------------------|----------------|----------------|--------|-------------------|
|               | Total events   | Total patients | Total events       | Total patients | I <sup>2</sup> | P      |                   |
| Severity      | 452            | 1501           | 673                | 2022           | 48%            | 0.69   | 0.95 [0.74, 1.22] |
| Mortality     | 2969           | 15483          | 2935               | 14089          | 70%            | 0.0003 | 0.74 [0.63, 0.87] |



Table S4. Oligos used in this study, Related to STAR Methods.

| <b>Oligo name</b>   |         | <b>Sequence (5'-3')</b>  | <b>Purpose</b> |
|---------------------|---------|--------------------------|----------------|
| Mouse <i>G6pc</i>   | Forward | AGGTCGTGGCTGGAGTCTTGTC   | qPCR           |
|                     | Reverse | GTAGCAGGTAGAATCCAAGCGC   | qPCR           |
| Mouse <i>Glut2</i>  | Forward | GTTGGAAGAGGAAGTCAGGGCA   | qPCR           |
|                     | Reverse | ATCACGGAGACCTTCTGCTCAG   | qPCR           |
| Mouse <i>Pgc1a</i>  | Forward | TGCCTGCATGAGTGTGTGCT     | qPCR           |
|                     | Reverse | GGCTGGTCTCACCAACCAG      | qPCR           |
| Mouse <i>Ppara</i>  | Forward | GAGTGCAGCCTCAGCCAAG      | qPCR           |
|                     | Reverse | TCCAGAGCTCTCCTCACCGA     | qPCR           |
| Mouse <i>Pparγ</i>  | Forward | ACGCGGAAGAAGAGACCTGG     | qPCR           |
|                     | Reverse | TGCGAGTGGTCTTCCATCACG    | qPCR           |
| Mouse <i>Tnfa</i>   | Forward | GGTGCCTATGTCTCAGCCTCTT   | qPCR           |
|                     | Reverse | GCCATAGAACTGATGAGAGGGAG  | qPCR           |
| Mouse <i>Il-1β</i>  | Forward | TGGACCTTCCAGGATGAGGACA   | qPCR           |
|                     | Reverse | GTTTCATCTCGGAGCCTGTAGTG  | qPCR           |
| Mouse <i>Il-6</i>   | Forward | TACCACTTCAACAAGTCGGAGGC  | qPCR           |
|                     | Reverse | CTGCAAGTGCATCATCGTTGTTC  | qPCR           |
| Mouse <i>Pck1</i>   | Forward | GGCGATGACATTGCCTGGATGA   | qPCR           |
|                     | Reverse | TGTCTTCACTGAGGTGCCAGGA   | qPCR           |
| Mouse <i>Gyl1</i>   | Forward | CCAGAGTTTCTGAACCTGTGGTG  | qPCR           |
|                     | Reverse | CCAAAGGACAGGTCTGACAAGG   | qPCR           |
| Mouse <i>Sglt1</i>  | Forward | ATGCTACACACCGAGGGCTG     | qPCR           |
|                     | Reverse | TTCTTGGCCGAGAGGCATCG     | qPCR           |
| Mouse <i>Dgat2</i>  | Forward | CTGTGCTCTACTTCACCTGGCT   | qPCR           |
|                     | Reverse | CTGGATGGGAAAGTAGTCTCGG   | qPCR           |
| Mouse <i>Fasn</i>   | Forward | CACAGTGTCTCAAAGGACATGCC  | qPCR           |
|                     | Reverse | CACCAGGTGTAGTGCCTTCCTC   | qPCR           |
| Mouse <i>Col3a1</i> | Forward | GACCAAAAGGTGATGCTGGACAG  | qPCR           |
|                     | Reverse | CAAGACCTCGTGCTCCAGTTAG   | qPCR           |
| Mouse <i>Gpt1</i>   | Forward | CCACTCAGTCTCTAAGGGCTAC   | qPCR           |
|                     | Reverse | ACACAACCGCACGTCATCAGT    | qPCR           |
| Mouse <i>Srebp1</i> | Forward | CGACTACATCCGCTTCTTGCAG   | qPCR           |
|                     | Reverse | CCTCCATAGACACATCTGTGCC   | qPCR           |
| Mouse <i>Vim</i>    | Forward | CGGAAAGTGGAATCCTTGCAGG   | qPCR           |
|                     | Reverse | AGCAGTGAGGTCAGGCTTGGAA   | qPCR           |
| Mouse <i>Cd36</i>   | Forward | GGACATTGAGATTCTTTTCCTCTG | qPCR           |
|                     | Reverse | GCAAAGGCATTGGCTGGAAGAAC  | qPCR           |
| Mouse <i>Mcp1</i>   | Forward | GCTACAAGAGGATCACCAGCAG   | qPCR           |
|                     | Reverse | GTCTGGACCCATTCTTCTTGG    | qPCR           |
| Mouse <i>Msr1</i>   | Forward | CGCAGTTCAATGACAGCATCC    | qPCR           |
|                     | Reverse | GCAAACACAAGGAGGTAGAGAGC  | qPCR           |
| Mouse <i>Lox1</i>   | Forward | GTCATCTCTGCCTGGTGTGT     | qPCR           |
|                     | Reverse | TGCCTTCTGCTGGGCTAACATC   | qPCR           |
| Mouse <i>Mmp2</i>   | Forward | CAAGGATGGACTCCTGGCACAT   | qPCR           |
|                     | Reverse | TACTCGCCATCAGCGTTCCCAT   | qPCR           |
| Mouse <i>Srb1</i>   | Forward | ACACCCGAATCCTCGCTGGAAT   | qPCR           |
|                     | Reverse | CCGTTGGCAAACAGAGTATCGG   | qPCR           |
| Mouse <i>Ace2</i>   | Forward | CACCTTGGGAATGAGGACACGG   | qPCR           |
|                     | Reverse | TTTCCCGTGCGCCAAGAT       | qPCR           |
| Mouse <i>Gapdh</i>  | Forward | CATCACTGCCACCCAGAAGACTG  | qPCR           |
|                     | Reverse | ATGCCAGTGAGCTTCCCGTTTCA  | qPCR           |
| Human <i>G6PC</i>   | Forward | AGGTCGTGGCTGGAGTCTTGTC   | qPCR           |
|                     | Reverse | GTAGCAGGTAGAATCCAAGCGC   | qPCR           |
| Human <i>GLUT2</i>  | Forward | TGCCACACTCACACAAGACCTG   | qPCR           |
|                     | Reverse | TGGAAGGAACCCAGCACAGC     | qPCR           |
| Human <i>PGC1α</i>  | Forward | ATTGGAGCCCCATGGATGAAGG   | qPCR           |
|                     | Reverse | ATTCGCCAGCGGCTGTFACT     | qPCR           |
| Human <i>PPARα</i>  | Forward | AGCTGTCAACCACAGTAGCTTG   | qPCR           |
|                     | Reverse | ATGACCGAGCCATCTGAGCC     | qPCR           |
| Human <i>PPARγ</i>  | Forward | AGCCTGCATTTCTGCATTCTGC   | qPCR           |
|                     | Reverse | CCACGGAGCTGATCCCAAAGT    | qPCR           |
| Human <i>TNFα</i>   | Forward | GAGGCGCTCCCCAAGAAGAC     | qPCR           |
|                     | Reverse | CAGGCTTGTCACTCGGGGTT     | qPCR           |
| Human <i>IL-1β</i>  | Forward | TCGAGGCACAAGGCACAACA     | qPCR           |
|                     | Reverse | TCACTGGCGAGCTCAGGTACT    | qPCR           |
| Human <i>IL-6</i>   | Forward | GCAAGGCTCTGGTTTCAGCCT    | qPCR           |
|                     | Reverse | TCGCTCCCTCTCCCTGTAAGT    | qPCR           |
| Human <i>IL-10</i>  | Forward | TGCAAAACCAAACCACAAGACAG  | qPCR           |

|                                   |         |                            |         |
|-----------------------------------|---------|----------------------------|---------|
| Human <i>ICAM-1</i>               | Reverse | TTCACTCTGCTGAAGGCATCTCG    | qPCR    |
|                                   | Forward | TGCCCTGATGGGCAGTCAAC       | qPCR    |
| Human <i>VCAM-1</i>               | Reverse | TCTCTCCTCACCAGCACCGT       | qPCR    |
|                                   | Forward | TGGTCGTGATCCTTGGAGCC       | qPCR    |
| Human <i>MMP9</i>                 | Reverse | GATGTGGTCCCCTCATTCTGT      | qPCR    |
|                                   | Forward | TGTGCCTTTGAGTCCGGTGG       | qPCR    |
| Human <i>ACE2</i>                 | Reverse | AAGACCGAGTCCAGCTTGCG       | qPCR    |
|                                   | Forward | TGAGGACACTGAGCTCGCTT       | qPCR    |
| Human <i>GAPDH</i>                | Reverse | TTGAACTGGGGTTGGGCGCT       | qPCR    |
|                                   | Forward | GCCATGTTGCAACCGGGAAG       | qPCR    |
| SARS-CoV-2 <i>Spike</i>           | Reverse | TAGCCTCGCTCCACCTGACT       | qPCR    |
|                                   | Forward | TCCTGGTGATTCTTCTTCAGGT     | qPCR    |
| pcDNA3.1-Flag-GFP<br>-ACE2(human) | Reverse | TCTGAGAGAGGGTCAAGTGC       | qPCR    |
|                                   | Forward | CTTGGTACCGAGCTCGGATCC      | Cloning |
| siACE2(human)                     | Reverse | GCCACCATGTCAAGCTCTTCCTGGCT | Cloning |
|                                   | Reverse | GAAAGGGCCCTCTAGACTCGA      |         |
| siACE2(mouse)                     |         | GAAAGGAGGTCTGAACATCATCAGTG | siRNA   |
| shACE2(mouse)                     |         | GAAGACCTGTTCTATCAAA        | siRNA   |
|                                   |         | GAGATAAACTTCTAACTGAAA      | siRNA   |
|                                   |         | CCGATCATCAAGCGTCAAC        | shRNA   |
|                                   |         | TACTCGAGTAGTTGACGCTT       |         |
|                                   |         | GATGATCGGTTTTT             |         |

---
